# Supplementary material
Source: MDPI journal article supplement (https://www.mdpi.com/2073-4433/14/2/372)
Supplement: s1 [file s1]

# Supplementary Materials: Temporal dynamics of CO<sub>2</sub> fluxes measured with eddy covariance system in maize, winter oilseed rape and winter wheat fields

Robert Czubaszek \* and Agnieszka Wysocka-Czubaszek

Faculty of Civil Engineering and Environmental Sciences, Bialystok University of Technology,  
Wiejska 45A Str., 15-351 Bialystok, Poland  
\* Correspondence: r.czubaszek@pb.edu.pl

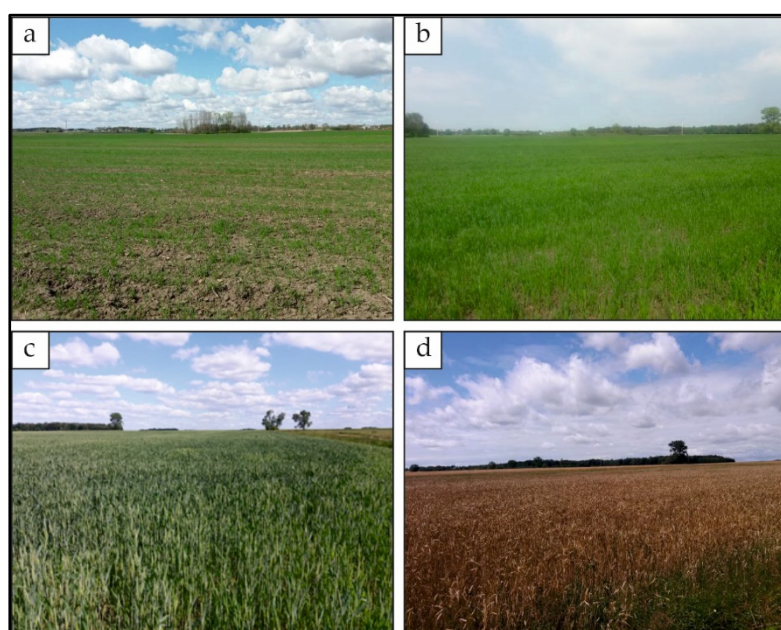

**Figure S1.** The development stages of wheat on: April 20, 2016 (a), May 20, 2016 (b), June 21, 2016 (c), July 18, 2016 (d).

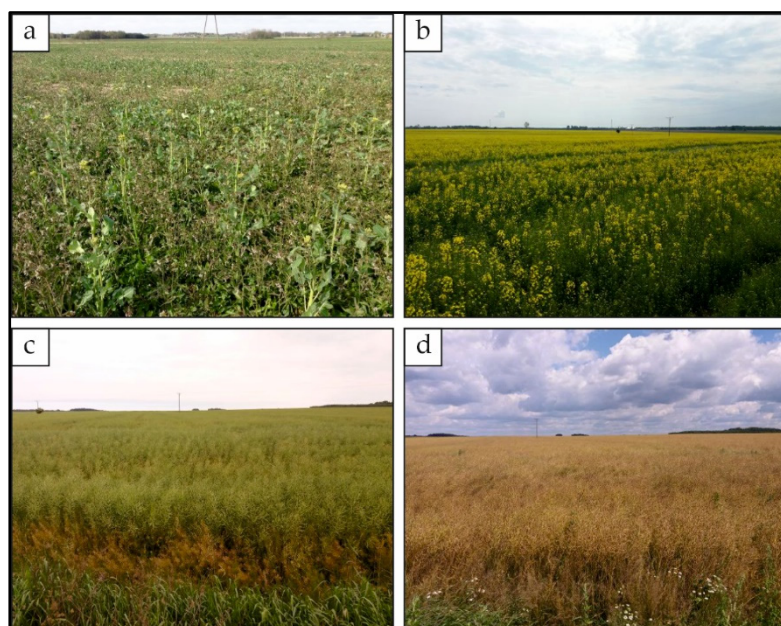

**Figure S2.** The development stages of oilseed rape on: April 26, 2016 (a), May 11, 2016 (b), June 9, 2016 (c), July 5, 2016 (d).

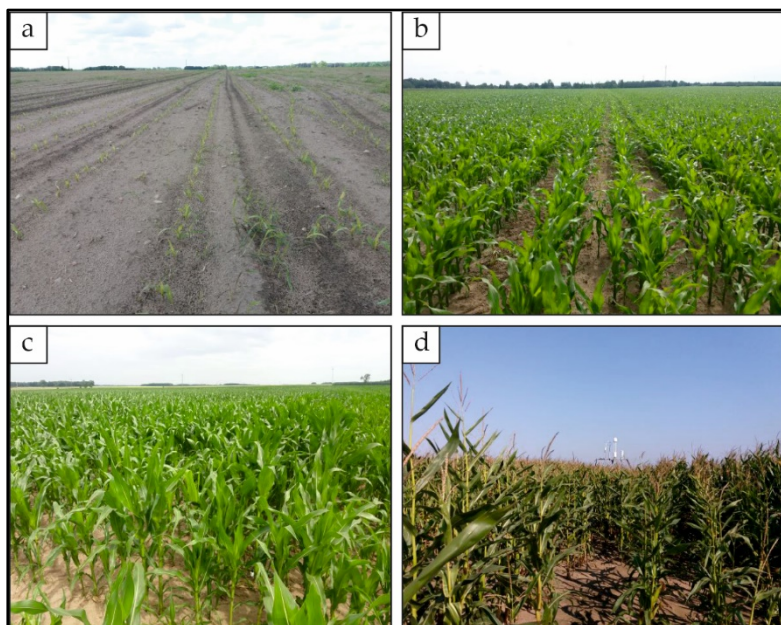

**Figure S3.** The development stages of maize on: May 19, 2016 (a), June 14, 2016 (b), June 28, 2016 (c), September 2, 2016 (d).

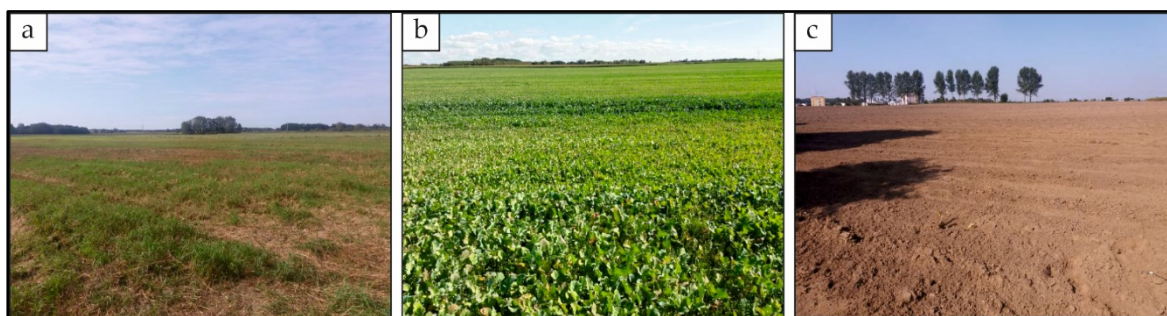

**Figure S4.** The surface of the studied fields after harvest: a—wheat field, b—oilseed rape field, c—maize field.
